# Supplementary material for: The somatic mutation landscape of Chinese Colorectal Cancer
Source: PubMed Central journal article supplement (PMC6959081; doi:10.7150/jca.37017), 2020-01-01
Supplement: jcav11p1038s1.pdf [file jcav11p1038s1.pdf]

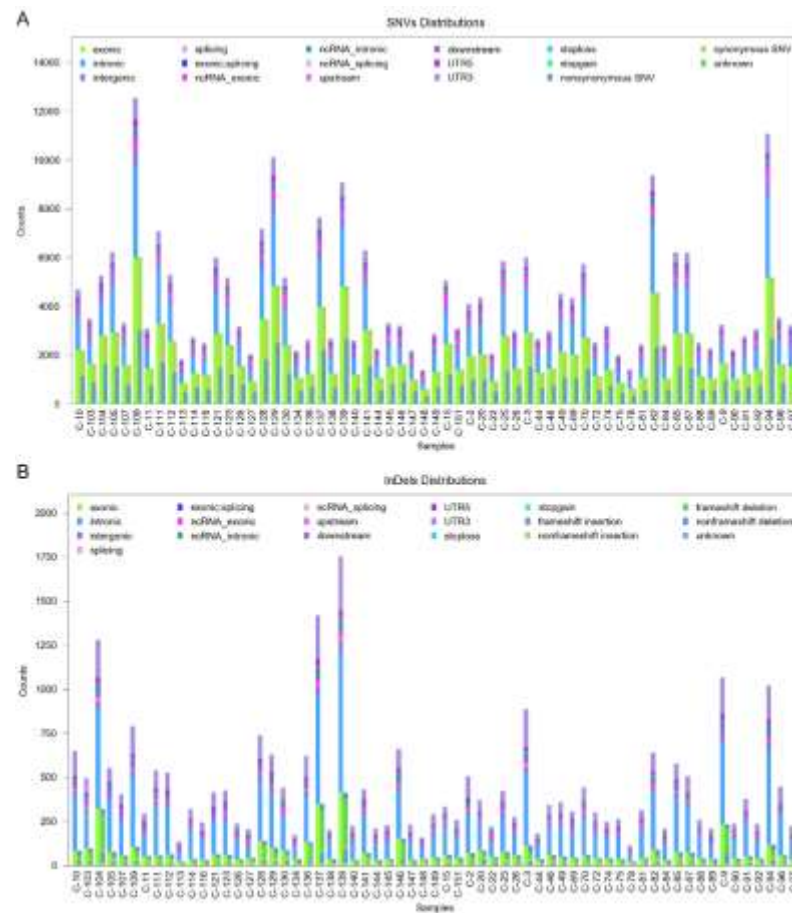

**Supplementary Figure S1. Mutation distributions of SNVs and InDels in all colorectal cancer samples.** A, SNVs distributions of all the samples. B, InDels distributions. The composition of SNV/InDels mutations was presented by different colors. X axis indicated different samples. Y axis represented the numbers.

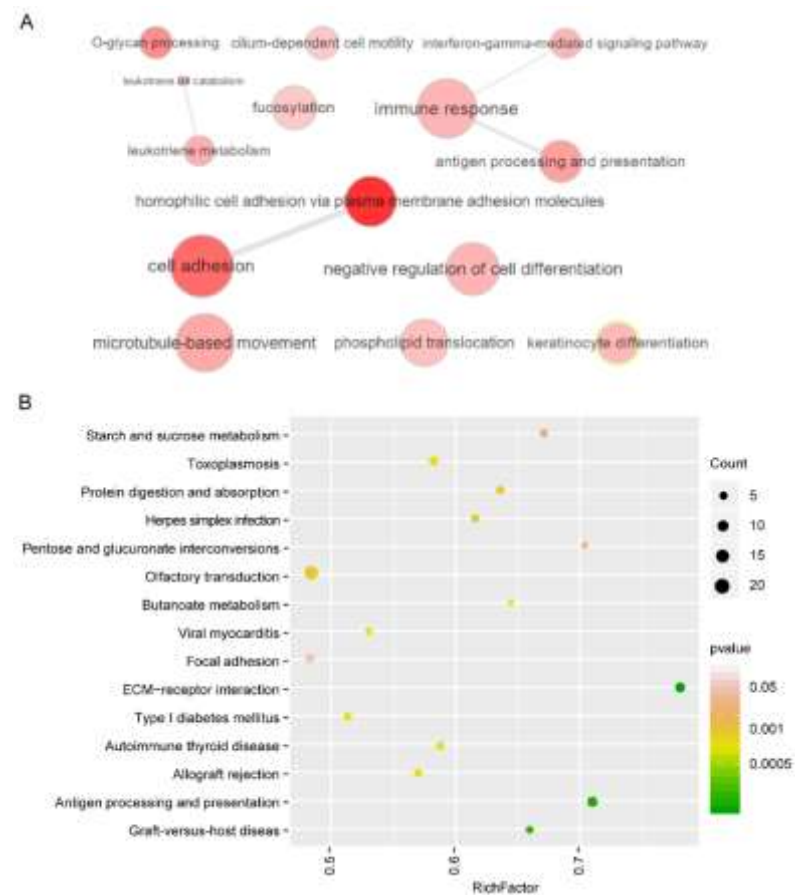

**Supplementary Figure S2. Gene Ontology analysis of the somatic mutation genes in Chinese CRC.** A, Biological process analysis of the top 500 mutated genes with DAVID 6.8. GO terms were visualized with REVIGO. B, KEGG pathway analysis of the top 500 mutated genes.

**Supplementary Table S1.** Clinical information of 63 CRC samples

| <b>Case No.</b> | <b>Gender</b> | <b>Histology</b> | <b>Metastatic location</b> |
|-----------------|---------------|------------------|----------------------------|
| C-10            | Male          | Adenocarcinoma   | Liver, Lungs, Lymph nodes  |
| C-103           | Male          | Adenocarcinoma   | Null                       |
| C-104           | Male          | Adenocarcinoma   | Lymph nodes                |
| C-105           | Male          | Adenocarcinoma   | Yes                        |
| C-107           | Male          | Adenocarcinoma   | Liver                      |
| C-109           | Male          | Adenocarcinoma   | Liver                      |
| C-11            | Male          | Adenocarcinoma   | Lungs                      |
| C-111           | Female        | Adenocarcinoma   | Null                       |
| C-112           | Male          | Adenocarcinoma   | Lungs                      |
| C-113           | Male          | Adenocarcinoma   | Lungs                      |
| C-114           | Male          | Adenocarcinoma   | Liver, Lungs               |
| C-116           | Male          | Adenocarcinoma   | Lungs                      |
| C-121           | Male          | Adenocarcinoma   | Lymph nodes                |
| C-123           | Male          | Adenocarcinoma   | Liver                      |
| C-126           | Male          | Adenocarcinoma   | Liver                      |
| C-127           | Male          | Adenocarcinoma   | Liver                      |
| C-128           | Female        | Adenocarcinoma   | Null                       |
| C-129           | Female        | Adenocarcinoma   | Lymph nodes                |
| C-130           | Male          | Adenocarcinoma   | Lymph nodes                |
| C-134           | Male          | Adenocarcinoma   | Lungs                      |
| C-136           | Female        | Adenocarcinoma   | Lungs                      |
| C-137           | Female        | Adenocarcinoma   | Liver                      |
| C-138           | Female        | Adenocarcinoma   | Liver                      |
| C-139           | Female        | Adenocarcinoma   | Yes                        |
| C-140           | Female        | Adenocarcinoma   | Null                       |
| C-141           | Male          | Adenocarcinoma   | Liver, Lungs               |
| C-144           | Female        | Adenocarcinoma   | Liver, Lungs               |

|       |        |                |                     |
|-------|--------|----------------|---------------------|
| C-145 | Male   | Adenocarcinoma | Liver               |
| C-146 | Male   | Adenocarcinoma | Liver               |
| C-147 | Female | Adenocarcinoma | Liver               |
| C-148 | Male   | Adenocarcinoma | Null                |
| C-149 | Female | Adenocarcinoma | Liver               |
| C-15  | Female | Adenocarcinoma | Lymph nodes         |
| C-151 | Male   | Adenocarcinoma | Liver               |
| C-2   | Male   | Adenocarcinoma | Liver               |
| C-20  | Female | Adenocarcinoma | Lymph nodes         |
| C-22  | Female | Adenocarcinoma | Lymph nodes         |
| C-25  | Female | Adenocarcinoma | Lymph nodes         |
| C-26  | Female | Adenocarcinoma | Liver, Lungs        |
| C-3   | Male   | Adenocarcinoma | Liver, Lungs, Bones |
| C-44  | Male   | Adenocarcinoma | Lymph nodes         |
| C-46  | Male   | Adenocarcinoma | Liver               |
| C-49  | Male   | Adenocarcinoma | Lymph nodes         |
| C-69  | Female | Adenocarcinoma | Null                |
| C-70  | Female | Adenocarcinoma | Lungs               |
| C-72  | Female | Adenocarcinoma | Liver               |
| C-74  | Male   | Adenocarcinoma | Null                |
| C-75  | Female | Adenocarcinoma | Lungs               |
| C-78  | Male   | Adenocarcinoma | Liver, Lymph nodes  |
| C-81  | Female | Adenocarcinoma | Yes                 |
| C-82  | Male   | Adenocarcinoma | Liver               |
| C-84  | Male   | Adenocarcinoma | Lymph nodes         |
| C-85  | Male   | Adenocarcinoma | Lymph nodes         |
| C-87  | Male   | Adenocarcinoma | Null                |
| C-88  | Male   | Adenocarcinoma | Lymph nodes         |
| C-89  | Male   | Adenocarcinoma | Null                |

|      |        |                |             |
|------|--------|----------------|-------------|
| C-9  | Female | Adenocarcinoma | Lungs       |
| C-90 | Male   | Adenocarcinoma | Liver       |
| C-91 | Female | Adenocarcinoma | Lymph nodes |
| C-92 | Male   | Adenocarcinoma | Liver       |
| C-94 | Female | Adenocarcinoma | Lymph nodes |
| C-96 | Male   | Adenocarcinoma | Lymph nodes |
| C-97 | Male   | Adenocarcinoma | Null        |

---

**Supplementary Table S2.** Coverage and depth of sequencing

| <b>Sample</b> | <b>Raw Reads</b> | <b>Clean Reads</b> | <b>Raw Bases(G)</b> | <b>Clean Bases(G)</b> | <b>Effective Rate(%)</b> | <b>N(ppm)</b> | <b>Q20(%)</b> | <b>Q30(%)</b> | <b>GC(%)</b> | <b>Mean depth(X)</b> | <b>Mean coverage(%)</b> |
|---------------|------------------|--------------------|---------------------|-----------------------|--------------------------|---------------|---------------|---------------|--------------|----------------------|-------------------------|
| C-10          | 126397537        | 118419215          | 18.5                | 17.06                 | 92.22                    | 81.67         | 98.55         | 95.42         | 49.12        | 289                  | 95.92                   |
| C-103         | 69517312         | 67067775           | 10.13               | 9.68                  | 95.56                    | 173.05        | 98.86         | 96.41         | 47.22        | 154                  | 95.73                   |
| C-104         | 91236678         | 87914649           | 13.43               | 12.82                 | 95.46                    | 168.73        | 98.88         | 96.43         | 47.78        | 214                  | 94.48                   |
| C-105         | 93097546         | 85375493           | 13.7                | 12.35                 | 90.15                    | 85.47         | 98.47         | 95.13         | 47.25        | 200                  | 95.94                   |
| C-107         | 92028692         | 87622333           | 13.62               | 12.81                 | 94.05                    | 165.91        | 98.75         | 96.04         | 50.55        | 215                  | 94.6                    |
| C-109         | 110759577        | 102993724          | 16.33               | 14.94                 | 91.49                    | 87.86         | 98.62         | 95.47         | 49.12        | 248                  | 95.96                   |
| C-11          | 91740949         | 83402887           | 13.58               | 12.12                 | 89.25                    | 76.22         | 98.41         | 95.03         | 52.12        | 202                  | 94.73                   |
| C-111         | 107444439        | 100463126          | 15.62               | 14.39                 | 92.13                    | 79.77         | 98.64         | 95.5          | 47.86        | 245                  | 95.77                   |
| C-112         | 93061212         | 85155136           | 13.72               | 12.34                 | 89.94                    | 84.4          | 98.48         | 95.13         | 47.5         | 200                  | 95.87                   |
| C-113         | 71137642         | 67280340           | 10.35               | 9.67                  | 93.43                    | 168           | 98.75         | 96.1          | 49.08        | 145                  | 94.22                   |
| C-114         | 82016782         | 78483478           | 12                  | 11.36                 | 94.67                    | 170.88        | 98.84         | 96.37         | 48.15        | 176                  | 95.71                   |
| C-116         | 70763282         | 68105058           | 10.33               | 9.85                  | 95.35                    | 169.47        | 98.85         | 96.35         | 48.16        | 155                  | 95.68                   |
| C-121         | 85317968         | 78509315           | 12.59               | 11.39                 | 90.47                    | 88.22         | 98.57         | 95.4          | 46.17        | 167                  | 95.76                   |
| C-123         | 77527611         | 69830056           | 11.47               | 10.13                 | 88.32                    | 84.86         | 98.41         | 94.94         | 46.42        | 160                  | 94.21                   |
| C-126         | 74781900         | 69459228           | 11.07               | 10.12                 | 91.42                    | 87.31         | 98.55         | 95.31         | 46.77        | 162                  | 95.86                   |
| C-127         | 67533779         | 63634604           | 9.88                | 9.19                  | 93.02                    | 165.78        | 98.75         | 96.1          | 48.58        | 128                  | 94.15                   |
| C-128         | 82111137         | 77077250           | 12.19               | 11.28                 | 92.53                    | 89.36         | 98.66         | 95.6          | 47.19        | 188                  | 95.77                   |
| C-129         | 111762514        | 104873386          | 16.66               | 15.4                  | 92.44                    | 89.87         | 98.7          | 95.73         | 48.39        | 265                  | 95.96                   |
| C-130         | 79990470         | 72374409           | 11.89               | 10.56                 | 88.81                    | 84.8          | 98.47         | 95.14         | 46.76        | 157                  | 94.36                   |
| C-134         | 59559845         | 56486722           | 8.69                | 8.15                  | 93.79                    | 166.38        | 98.74         | 96.03         | 49.63        | 139                  | 94.49                   |
| C-136         | 69966929         | 67753517           | 10.18               | 9.76                  | 95.87                    | 174.38        | 98.88         | 96.5          | 46.84        | 156                  | 94.3                    |
| C-137         | 96823718         | 90484912           | 14.24               | 13.11                 | 92.06                    | 89.44         | 98.64         | 95.56         | 47.69        | 226                  | 94.17                   |
| C-138         | 70545545         | 67791865           | 10.19               | 9.7                   | 95.19                    | 172.81        | 98.88         | 96.47         | 48.33        | 168                  | 95.79                   |
| C-139         | 100073189        | 93115345           | 14.92               | 13.68                 | 91.69                    | 87.2          | 98.6          | 95.41         | 46.75        | 228                  | 94.2                    |
| C-140         | 70869844         | 68100261           | 10.14               | 9.64                  | 95.07                    | 177.33        | 98.92         | 96.59         | 48.53        | 152                  | 95.46                   |
| C-141         | 79975894         | 74933697           | 11.91               | 11                    | 92.36                    | 90.55         | 98.71         | 95.75         | 47.88        | 182                  | 94.38                   |

|       |           |           |       |       |       |        |       |       |       |     |       |
|-------|-----------|-----------|-------|-------|-------|--------|-------|-------|-------|-----|-------|
| C-144 | 64573965  | 61821451  | 9.26  | 8.77  | 94.71 | 171.8  | 98.83 | 96.34 | 48.7  | 139 | 95.49 |
| C-145 | 79482418  | 76556433  | 11.57 | 11.03 | 95.33 | 171.51 | 98.83 | 96.31 | 49.16 | 189 | 95.71 |
| C-146 | 78354740  | 75713603  | 11.37 | 10.88 | 95.69 | 173.68 | 98.86 | 96.41 | 47.86 | 176 | 94.29 |
| C-147 | 72007544  | 69073609  | 10.7  | 10.14 | 94.77 | 165.63 | 98.75 | 96.08 | 49.29 | 172 | 95.78 |
| C-148 | 56708023  | 53118621  | 8.16  | 7.55  | 92.52 | 168.78 | 98.7  | 95.98 | 49.26 | 108 | 94.09 |
| C-149 | 88804535  | 85584773  | 12.96 | 12.36 | 95.37 | 172.56 | 98.86 | 96.4  | 48.2  | 208 | 95.77 |
| C-15  | 85435671  | 77567276  | 11.73 | 10.5  | 89.51 | 91     | 98.48 | 95.09 | 53.05 | 172 | 95.46 |
| C-151 | 69790050  | 67132647  | 10.14 | 9.65  | 95.17 | 172.51 | 98.84 | 96.37 | 48.13 | 165 | 95.78 |
| C-2   | 101583999 | 94408030  | 14.87 | 13.59 | 91.39 | 77.95  | 98.51 | 95.34 | 48.78 | 217 | 96.28 |
| C-20  | 105087277 | 98235845  | 14.55 | 13.39 | 92.03 | 87.53  | 98.72 | 95.77 | 51.3  | 174 | 95.44 |
| C-22  | 58368884  | 53423960  | 8.19  | 7.48  | 91.33 | 94.55  | 98.66 | 95.58 | 51.04 | 109 | 93.85 |
| C-25  | 93868015  | 86672980  | 13.68 | 12.41 | 90.72 | 79.13  | 98.56 | 95.25 | 49.39 | 207 | 95.72 |
| C-26  | 84546319  | 78941728  | 11.99 | 11.03 | 91.99 | 92.78  | 98.66 | 95.63 | 50.17 | 165 | 95.43 |
| C-3   | 163689279 | 151647693 | 24.38 | 22.2  | 91.06 | 74.55  | 98.46 | 95.15 | 51.51 | 304 | 94.85 |
| C-44  | 82389194  | 75965837  | 12.05 | 10.91 | 90.54 | 77.08  | 98.47 | 95.2  | 50.47 | 170 | 96.15 |
| C-46  | 131859462 | 124638696 | 19.2  | 17.89 | 93.18 | 82.61  | 98.66 | 95.69 | 51.25 | 289 | 95.83 |
| C-49  | 97517247  | 88534854  | 14.19 | 12.64 | 89.08 | 77.13  | 98.45 | 94.95 | 49.2  | 206 | 95.74 |
| C-69  | 55245337  | 50423751  | 8.22  | 7.36  | 89.54 | 76.39  | 98.45 | 94.97 | 47.84 | 110 | 95.82 |
| C-70  | 94051359  | 88201528  | 13.75 | 12.7  | 92.36 | 84.06  | 98.59 | 95.58 | 47.35 | 199 | 95.87 |
| C-72  | 76565020  | 72915320  | 11.23 | 10.57 | 94.12 | 167.54 | 98.8  | 96.25 | 48    | 163 | 94.23 |
| C-74  | 70270311  | 67235463  | 10.15 | 9.61  | 94.68 | 174.16 | 98.87 | 96.47 | 48.07 | 140 | 95.7  |
| C-75  | 68255674  | 65545296  | 10    | 9.5   | 95    | 171.03 | 98.86 | 96.39 | 48.67 | 164 | 95.8  |
| C-78  | 66745300  | 64219473  | 9.72  | 9.25  | 95.16 | 172.59 | 98.84 | 96.37 | 46.77 | 155 | 95.74 |
| C-81  | 72252660  | 69468010  | 10.56 | 10.06 | 95.27 | 172.89 | 98.89 | 96.47 | 48    | 169 | 95.8  |
| C-82  | 69236210  | 63546466  | 10.33 | 9.32  | 90.22 | 72.45  | 98.37 | 94.79 | 46.71 | 144 | 95.84 |
| C-84  | 67149557  | 63238321  | 9.54  | 9     | 94.34 | 176.81 | 98.9  | 96.55 | 47.48 | 124 | 95.6  |
| C-85  | 101375597 | 94755464  | 15.14 | 13.93 | 92.01 | 79.09  | 98.61 | 95.38 | 47.67 | 229 | 95.83 |
| C-87  | 82710653  | 76349307  | 12.13 | 11    | 90.68 | 79.03  | 98.56 | 95.28 | 47.3  | 177 | 95.93 |
| C-88  | 78067018  | 74669518  | 11.33 | 10.73 | 94.7  | 173.98 | 98.88 | 96.47 | 48.01 | 183 | 95.83 |

|      |           |           |       |       |       |        |       |       |       |     |       |
|------|-----------|-----------|-------|-------|-------|--------|-------|-------|-------|-----|-------|
| C-89 | 67054934  | 64020028  | 9.72  | 9.17  | 94.34 | 172.84 | 98.83 | 96.3  | 49.89 | 156 | 95.93 |
| C-9  | 94583795  | 88033729  | 13.92 | 12.75 | 91.59 | 81.93  | 98.5  | 95.31 | 48.75 | 210 | 95.96 |
| C-90 | 73277295  | 70399565  | 10.65 | 10.11 | 94.93 | 172.76 | 98.82 | 96.31 | 48.31 | 173 | 95.91 |
| C-91 | 76588678  | 73187183  | 11.22 | 10.62 | 94.65 | 172.46 | 98.87 | 96.42 | 47.61 | 175 | 94.41 |
| C-92 | 85108188  | 82282593  | 12.31 | 11.78 | 95.69 | 176.07 | 98.89 | 96.52 | 47.19 | 190 | 95.72 |
| C-94 | 134796523 | 124760753 | 20.14 | 18.32 | 90.96 | 76.47  | 98.54 | 95.2  | 47.03 | 302 | 95.96 |
| C-96 | 99877438  | 96111376  | 14.6  | 13.9  | 95.21 | 170.5  | 98.87 | 96.39 | 48.66 | 241 | 95.8  |
| C-97 | 87183695  | 83556298  | 12.89 | 12.22 | 94.8  | 167.59 | 98.81 | 96.25 | 47.45 | 200 | 96.07 |

---



**Supplementary Table S3.** Classifications of variants

| <b>Tumor Sample</b> | <b>Nonframeshift deletion</b> | <b>Nonframeshift insertion</b> | <b>Frameshift deletion</b> | <b>Frameshift insertion</b> | <b>InDel</b> | <b>Specify InDels/Mb</b> | <b>Nonsynonymous SNVs</b> | <b>Synonymous SNVs</b> | <b>Stopgain</b> | <b>Splicing</b> | <b>SNV</b> | <b>Specify SNVs/Mb</b> | <b>Total</b> | <b>Total_mutations/Mb</b> |
|---------------------|-------------------------------|--------------------------------|----------------------------|-----------------------------|--------------|--------------------------|---------------------------|------------------------|-----------------|-----------------|------------|------------------------|--------------|---------------------------|
| C-109               | 29                            | 22                             | 30                         | 21                          | 102          | 2.9800238                | 2974                      | 2894                   | 39              | 17              | 5924       | 173.07511              | 6026         | 176.05513                 |
| C-94                | 32                            | 15                             | 37                         | 25                          | 109          | 3.1843183                | 2621                      | 2443                   | 36              | 21              | 5121       | 149.60453              | 5230         | 152.78885                 |
| C-139               | 37                            | 13                             | 267                        | 78                          | 395          | 11.564808                | 2574                      | 2079                   | 86              | 25              | 4764       | 139.48037              | 5159         | 151.04518                 |
| C-129               | 30                            | 26                             | 24                         | 13                          | 93           | 2.7170039                | 2461                      | 2273                   | 36              | 14              | 4784       | 139.76502              | 4877         | 142.48202                 |
| C-82                | 25                            | 19                             | 25                         | 15                          | 84           | 2.4553571                | 2292                      | 2133                   | 28              | 21              | 4474       | 130.77699              | 4558         | 133.23235                 |
| C-137               | 38                            | 15                             | 216                        | 65                          | 334          | 9.7843268                | 2157                      | 1671                   | 57              | 26              | 3911       | 114.57037              | 4245         | 124.35469                 |
| C-128               | 20                            | 15                             | 72                         | 24                          | 131          | 3.8306006                | 1774                      | 1600                   | 31              | 14              | 3419       | 99.97575               | 3550         | 103.80635                 |
| C-111               | 15                            | 12                             | 11                         | 15                          | 53           | 1.5506019                | 1658                      | 1532                   | 28              | 10              | 3228       | 94.440431              | 3281         | 95.991033                 |
| C-104               | 25                            | 11                             | 206                        | 60                          | 302          | 8.8393172                | 1573                      | 1112                   | 57              | 21              | 2763       | 80.870971              | 3065         | 89.710288                 |
| C-141               | 19                            | 16                             | 22                         | 9                           | 66           | 1.9306639                | 1511                      | 1417                   | 28              | 10              | 2966       | 86.762868              | 3032         | 88.693532                 |
| C-3                 | 37                            | 16                             | 35                         | 24                          | 112          | 3.2673977                | 1471                      | 1375                   | 21              | 12              | 2879       | 83.989626              | 2991         | 87.257023                 |
| C-105               | 22                            | 14                             | 17                         | 21                          | 74           | 2.1625545                | 1502                      | 1356                   | 26              | 10              | 2894       | 84.573415              | 2968         | 86.735969                 |
| C-85                | 20                            | 16                             | 21                         | 15                          | 72           | 2.1057693                | 1493                      | 1345                   | 22              | 11              | 2871       | 83.967553              | 2943         | 86.073322                 |
| C-87                | 22                            | 17                             | 13                         | 16                          | 68           | 1.987325                 | 1431                      | 1383                   | 27              | 8               | 2849       | 83.263071              | 2917         | 85.250396                 |
| C-121               | 17                            | 15                             | 14                         | 12                          | 58           | 1.6961868                | 1461                      | 1331                   | 17              | 8               | 2817       | 82.382041              | 2875         | 84.078227                 |
| C-25                | 29                            | 10                             | 23                         | 11                          | 73           | 2.1359968                | 1329                      | 1377                   | 20              | 9               | 2735       | 80.02673               | 2808         | 82.162727                 |
| C-70                | 15                            | 10                             | 18                         | 11                          | 54           | 1.5776871                | 1399                      | 1239                   | 21              | 14              | 2673       | 78.09551               | 2727         | 79.673197                 |
| C-112               | 20                            | 13                             | 15                         | 11                          | 59           | 1.7247467                | 1271                      | 1225                   | 19              | 9               | 2524       | 73.784081              | 2583         | 75.508827                 |
| C-15                | 20                            | 16                             | 12                         | 12                          | 60           | 1.7579728                | 1169                      | 1228                   | 17              | 10              | 2424       | 71.022103              | 2484         | 72.780076                 |
| C-130               | 21                            | 17                             | 19                         | 23                          | 80           | 2.3403168                | 1214                      | 1124                   | 20              | 7               | 2365       | 69.185614              | 2445         | 71.525931                 |
| C-123               | 20                            | 15                             | 9                          | 12                          | 56           | 1.6400432                | 1192                      | 1137                   | 15              | 12              | 2356       | 68.99896               | 2412         | 70.639004                 |
| C-10                | 23                            | 11                             | 18                         | 25                          | 77           | 2.2505564                | 1101                      | 1047                   | 14              | 4               | 2166       | 63.30786               | 2243         | 65.558417                 |
| C-49                | 19                            | 8                              | 12                         | 7                           | 46           | 1.34545                  | 1051                      | 1018                   | 7               | 13              | 2089       | 61.100981              | 2135         | 62.446431                 |
| C-20                | 15                            | 11                             | 21                         | 30                          | 77           | 2.2560794                | 975                       | 1017                   | 12              | 14              | 2018       | 59.126861              | 2095         | 61.38294                  |
| C-69                | 13                            | 11                             | 9                          | 5                           | 38           | 1.1095348                | 1024                      | 950                    | 12              | 14              | 2000       | 58.396566              | 2038         | 59.506101                 |

|       |    |    |     |    |     |           |     |     |    |    |      |           |      |           |
|-------|----|----|-----|----|-----|-----------|-----|-----|----|----|------|-----------|------|-----------|
| C-2   | 23 | 8  | 22  | 16 | 69  | 2.0120616 | 977 | 936 | 17 | 9  | 1939 | 56.541848 | 2008 | 58.55391  |
| C-9   | 16 | 6  | 133 | 63 | 218 | 6.3701703 | 913 | 706 | 25 | 15 | 1659 | 48.47758  | 1877 | 54.847751 |
| C-146 | 17 | 4  | 95  | 29 | 145 | 4.2479816 | 860 | 683 | 34 | 9  | 1586 | 46.46413  | 1731 | 50.712111 |
| C-103 | 15 | 9  | 53  | 16 | 93  | 2.7212801 | 859 | 710 | 22 | 10 | 1601 | 46.846983 | 1694 | 49.568263 |
| C-96  | 16 | 9  | 12  | 16 | 53  | 1.5495069 | 842 | 738 | 10 | 5  | 1595 | 46.631387 | 1648 | 48.180894 |
| C-107 | 14 | 7  | 14  | 17 | 52  | 1.5204078 | 760 | 755 | 15 | 4  | 1534 | 44.852029 | 1586 | 46.372437 |
| C-145 | 11 | 14 | 5   | 5  | 35  | 1.0233976 | 788 | 701 | 14 | 9  | 1512 | 44.210778 | 1547 | 45.234176 |
| C-126 | 10 | 11 | 9   | 2  | 32  | 0.9353788 | 774 | 727 | 9  | 3  | 1513 | 44.225878 | 1545 | 45.161256 |
| C-97  | 12 | 6  | 7   | 2  | 27  | 0.7882339 | 769 | 715 | 11 | 3  | 1498 | 43.732382 | 1525 | 44.520616 |
| C-46  | 23 | 10 | 15  | 13 | 61  | 1.7832162 | 745 | 672 | 9  | 10 | 1436 | 41.978663 | 1497 | 43.761879 |
| C-11  | 14 | 16 | 10  | 7  | 47  | 1.3720898 | 714 | 693 | 12 | 4  | 1423 | 41.542208 | 1470 | 42.914298 |
| C-26  | 18 | 7  | 13  | 13 | 51  | 1.4949021 | 722 | 668 | 12 | 7  | 1409 | 41.300335 | 1460 | 42.795237 |
| C-151 | 18 | 6  | 13  | 5  | 42  | 1.2284747 | 716 | 645 | 11 | 3  | 1375 | 40.217921 | 1417 | 41.446396 |
| C-92  | 11 | 8  | 8   | 7  | 34  | 0.9946409 | 726 | 634 | 14 | 4  | 1378 | 40.31221  | 1412 | 41.30685  |
| C-74  | 13 | 10 | 10  | 3  | 36  | 1.0534297 | 738 | 613 | 9  | 7  | 1367 | 40.001065 | 1403 | 41.054495 |
| C-136 | 16 | 4  | 78  | 25 | 123 | 3.604459  | 669 | 507 | 26 | 10 | 1212 | 35.517108 | 1335 | 39.121567 |
| C-149 | 14 | 11 | 9   | 8  | 42  | 1.2284203 | 656 | 614 | 8  | 8  | 1286 | 37.61306  | 1328 | 38.84148  |
| C-91  | 15 | 11 | 10  | 11 | 47  | 1.3755295 | 660 | 563 | 11 | 7  | 1241 | 36.319831 | 1288 | 37.695361 |
| C-44  | 21 | 7  | 5   | 4  | 37  | 1.0799672 | 640 | 595 | 5  | 4  | 1244 | 36.310247 | 1281 | 37.390214 |
| C-138 | 15 | 7  | 6   | 4  | 32  | 0.9359138 | 636 | 579 | 14 | 9  | 1238 | 36.208164 | 1270 | 37.144078 |
| C-114 | 11 | 5  | 11  | 8  | 35  | 1.0241846 | 635 | 569 | 11 | 4  | 1219 | 35.670887 | 1254 | 36.695072 |
| C-140 | 12 | 5  | 6   | 3  | 26  | 0.7619014 | 593 | 565 | 12 | 1  | 1171 | 34.314867 | 1197 | 35.076769 |
| C-72  | 11 | 15 | 4   | 7  | 37  | 1.0836139 | 557 | 554 | 9  | 7  | 1127 | 33.006293 | 1164 | 34.089907 |
| C-88  | 12 | 8  | 8   | 8  | 36  | 1.0526249 | 573 | 537 | 8  | 5  | 1123 | 32.836049 | 1159 | 33.888674 |
| C-116 | 11 | 6  | 7   | 3  | 27  | 0.7902222 | 587 | 525 | 9  | 8  | 1129 | 33.042996 | 1156 | 33.833218 |
| C-81  | 12 | 8  | 10  | 11 | 41  | 1.1986108 | 542 | 486 | 14 | 4  | 1046 | 30.579192 | 1087 | 31.777803 |
| C-134 | 15 | 8  | 9   | 1  | 33  | 0.9658138 | 511 | 514 | 11 | 4  | 1040 | 30.43777  | 1073 | 31.403584 |
| C-84  | 13 | 5  | 6   | 2  | 26  | 0.7612669 | 547 | 474 | 10 | 5  | 1036 | 30.333557 | 1062 | 31.094824 |
| C-144 | 13 | 5  | 6   | 5  | 29  | 0.8498409 | 547 | 467 | 10 | 6  | 1030 | 30.184005 | 1059 | 31.033846 |

|       |    |    |    |    |    |           |     |     |    |   |      |           |      |           |
|-------|----|----|----|----|----|-----------|-----|-----|----|---|------|-----------|------|-----------|
| C-89  | 19 | 2  | 7  | 8  | 36 | 1.05216   | 535 | 459 | 10 | 5 | 1009 | 29.489707 | 1045 | 30.541867 |
| C-90  | 13 | 7  | 9  | 7  | 36 | 1.0521109 | 528 | 469 | 9  | 2 | 1008 | 29.459105 | 1044 | 30.511216 |
| C-147 | 11 | 3  | 3  | 9  | 26 | 0.7605005 | 514 | 450 | 7  | 5 | 976  | 28.548018 | 1002 | 29.308518 |
| C-22  | 13 | 7  | 12 | 11 | 43 | 1.2612415 | 488 | 390 | 17 | 6 | 901  | 26.427409 | 944  | 27.688651 |
| C-127 | 15 | 11 | 9  | 4  | 39 | 1.142901  | 474 | 416 | 7  | 4 | 901  | 26.403944 | 940  | 27.546845 |
| C-75  | 9  | 5  | 14 | 4  | 32 | 0.9359587 | 423 | 397 | 1  | 6 | 827  | 24.188683 | 859  | 25.124642 |
| C-113 | 6  | 5  | 8  | 0  | 19 | 0.5563842 | 452 | 367 | 12 | 1 | 832  | 24.363771 | 851  | 24.920155 |
| C-78  | 6  | 5  | 5  | 2  | 18 | 0.526642  | 311 | 288 | 8  | 4 | 611  | 17.876571 | 629  | 18.403213 |
| C-148 | 9  | 9  | 8  | 5  | 31 | 0.9087928 | 314 | 273 | 6  | 2 | 595  | 17.442958 | 626  | 18.351751 |

---

**Supplementary Table S4. List of 16 somatic mutation genes**

| <b>Gene</b> | <b>Chinese CRC</b> | <b>TCGA</b> | <b>SOSMIC</b> |
|-------------|--------------------|-------------|---------------|
| HYDIN       | 88.89%             | 18.16%      | 6.55%         |
| FLG         | 88.89%             | 23.41%      | 14.29%        |
| FCGBP       | 87.30%             | 14.04%      | NA            |
| MUC16       | 85.71%             | 35.58%      | 22.83%        |
| OBSCN       | 85.71%             | 26.59%      | 16.39%        |
| PDE4DIP     | 82.54%             | 7.68%       | 5.23%         |
| TNXB        | 73.02%             | 13.86%      | 8.97%         |
| MUC12       | 73.02%             | 0.19%       | 1.81%         |
| MUC5B       | 71.43%             | 18.91%      | 9.87%         |
| ADAMTS7     | 71.43%             | 5.99%       | 3.86%         |
| TTN         | 69.84%             | 63.86%      | 39.57%        |
| NBPF1       | 66.67%             | 2.06%       | NA            |
| TP53        | 36.50%             | 64.42%      | 43.33%        |
| APC         | 31.70%             | 79.96%      | 44.53%        |
| KRAS        | 15.87%             | 42.88%      | 33.05%        |
| PIK3CA      | 12.70%             | 27.34%      | 13.65%        |

**Table S5. Significantly mutated genes in Chinese CRC**

| Gene            | Expression | Replication time | hic | n_nonsilent | n_silent | n_noncoding | nnei | p           | q           | Sample Percent(%) |
|-----------------|------------|------------------|-----|-------------|----------|-------------|------|-------------|-------------|-------------------|
| <b>NBPF1</b>    | 675669     | 259              | 40  | 71          | 26       | 34          | 5    | 2.10486E-09 | 6.17283E-07 | 66.67             |
| <b>CYP2A7</b>   | 1187304    | 275              | 31  | 98          | 8        | 22          | 2    | 1.40146E-10 | 6.29389E-08 | 61.9              |
| <b>PSG9</b>     | 312803     | 148              | -41 | 51          | 18       | 10          | 0    | 1.08643E-06 | 0.000147426 | 61.9              |
| <b>KRTAP1-5</b> | 977588     | 404              | 10  | 59          | 6        | 1           | 2    | 1.77636E-15 | 1.97092E-12 | 60.32             |
| <b>KRT10</b>    | 836683     | 269              | -10 | 62          | 0        | 0           | 1    | 2.55351E-15 | 2.53497E-12 | 55.56             |
| <b>KCNG4</b>    | 582429     | 364              | 12  | 42          | 3        | 0           | 3    | 6.66134E-16 | 1.04705E-12 | 52.38             |
| <b>ZNF808</b>   | 546511     | 1005             | -53 | 44          | 0        | 0           | 0    | 9.18573E-07 | 0.000126988 | 52.38             |
| MAGEC1          | 17504      | NA               | -11 | 48          | 2        | 0           | 0    | 1.2952E-06  | 0.000174501 | 52.38             |
| LILRB4          | 978578     | 625              | -1  | 34          | 3        | 1           | 0    | 1.19056E-08 | 2.7724E-06  | 49.21             |
| NEFH            | 723458     | 203              | 35  | 33          | 5        | 0           | 3    | 2.6017E-12  | 1.63577E-09 | 47.62             |
| UGT2B11         | 18988      | 929              | 1   | 45          | 22       | 9           | 0    | 1.57783E-09 | 4.80018E-07 | 47.62             |
| PSG11           | 263820     | 178              | -32 | 53          | 8        | 18          | 0    | 9.14502E-12 | 5.07333E-09 | 46.03             |
| OR4A15          | 1067       | 1102             | -42 | 30          | 0        | 0           | 1    | 1.6694E-11  | 8.74672E-09 | 46.03             |
| CYP4A11         | 492091     | 578              | 5   | 31          | 3        | 12          | 5    | 4.83437E-10 | 1.72049E-07 | 46.03             |
| TRDN            | 23697      | 1090             | -16 | 34          | 0        | 19          | 1    | 3.56969E-06 | 0.000410314 | 46.03             |
| ACSM2A          | 181483     | 823              | 6   | 32          | 0        | 21          | 3    | 1E-18       | 1E-16       | 42.86             |
| AGAP5           | NA         | NA               | NA  | 38          | 0        | 6           | 2    | 1.68363E-09 | 5.04073E-07 | 42.86             |
| TTLL6           | 727820     | 415              | 24  | 42          | 2        | 0           | 0    | 1.82551E-07 | 3.12217E-05 | 42.86             |
| GSPT1           | 564730     | 294              | 51  | 29          | 1        | 0           | 0    | 4.33757E-07 | 6.70617E-05 | 42.86             |
| SIGLEC12        | 360870     | 583              | -4  | 34          | 2        | 4           | 3    | 5.26218E-07 | 7.8774E-05  | 42.86             |
| TPTE            | 30271      | 1268             | -81 | 51          | 17       | 95          | 0    | 3.96259E-06 | 0.000442263 | 42.86             |
| AKNA            | 218424     | 360              | 14  | 42          | 6        | 10          | 4    | 7.91352E-06 | 0.000806836 | 42.86             |
| ACADS           | 1741363    | 349              | 42  | 27          | 1        | 12          | 2    | 1.11022E-16 | 1.90373E-13 | 41.27             |
| PRG4            | 265627     | 419              | -24 | 39          | 3        | 6           | 4    | 1.67405E-10 | 7.34323E-08 | 41.27             |
| UNC93A          | 254009     | 704              | 1   | 36          | 3        | 6           | 0    | 1.83735E-07 | 3.12217E-05 | 41.27             |
| RAET1L          | 402308     | 382              | 51  | 32          | 4        | 0           | 2    | 2.22064E-09 | 6.25159E-07 | 39.68             |
| RBM19           | 198554     | 673              | 11  | 47          | 9        | 14          | 0    | 4.50803E-06 | 0.000500179 | 39.68             |

|             |         |     |     |    |    |    |    |             |             |       |
|-------------|---------|-----|-----|----|----|----|----|-------------|-------------|-------|
| ZNF225      | 554986  | 634 | -28 | 26 | 0  | 0  | 1  | 4.95399E-06 | 0.000540128 | 39.68 |
| PRAMEF1     | 141239  | 571 | 18  | 28 | 10 | 7  | 0  | 7.51756E-06 | 0.000770632 | 39.68 |
| OR2T3       | 112460  | 903 | -20 | 25 | 0  | 3  | 5  | 1E-18       | 1E-16       | 38.1  |
| OR9G1       | NA      | NA  | NA  | 31 | 0  | 0  | 6  | 1.46549E-14 | 1.31629E-11 | 38.1  |
| TUBB1       | 978901  | 125 | 28  | 37 | 0  | 0  | 2  | 4.17205E-11 | 2.01778E-08 | 38.1  |
| IBSP        | 423426  | 538 | 1   | 35 | 1  | 0  | 2  | 2.15993E-09 | 6.17283E-07 | 38.1  |
| MSH3        | 319054  | 752 | 36  | 33 | 0  | 46 | 0  | 4.716E-07   | 7.17365E-05 | 38.1  |
| ZNF302      | 910826  | 607 | -54 | 42 | 0  | 10 | 2  | 8.76856E-07 | 0.000122513 | 38.1  |
| LCE1F       | 64902   | 818 | 18  | 24 | 0  | 0  | 1  | 1E-18       | 1E-16       | 36.51 |
| <b>TP53</b> | 2069567 | 213 | 34  | 32 | 0  | 2  | 3  | 1E-18       | 1E-16       | 36.51 |
| KIAA1586    | 431412  | 348 | 29  | 37 | 0  | 1  | 1  | 5.52095E-09 | 1.42652E-06 | 36.51 |
| KRT35       | 1445853 | 325 | -22 | 26 | 2  | 1  | 5  | 1.95819E-07 | 3.26862E-05 | 36.51 |
| MTX2        | 239999  | 888 | 11  | 25 | 0  | 10 | 1  | 6.22492E-06 | 0.000658888 | 36.51 |
| TRIM64B     | NA      | NA  | NA  | 22 | 0  | 0  | 6  | 1.33227E-15 | 1.67528E-12 | 34.92 |
| NFKBIE      | 1037256 | 312 | 54  | 35 | 0  | 0  | 0  | 4.77472E-08 | 9.58093E-06 | 34.92 |
| THSD7B      | 11902   | 824 | -16 | 25 | 15 | 24 | 1  | 2.76414E-06 | 0.000329983 | 34.92 |
| DNM1L       | 307288  | 308 | -5  | 21 | 20 | 5  | 2  | 2.44249E-15 | 2.53497E-12 | 33.33 |
| IGLL1       | 604420  | 399 | 31  | 22 | 0  | 0  | 17 | 2.59792E-14 | 2.22736E-11 | 33.33 |
| CBWD6       | NA      | NA  | NA  | 22 | 1  | 1  | 1  | 1.34617E-06 | 0.000178813 | 33.33 |
| SERPINE1    | 1066804 | 272 | 39  | 22 | 0  | 0  | 0  | 1.47371E-06 | 0.000194386 | 33.33 |
| BPI         | 562486  | 350 | 45  | 26 | 8  | 4  | 2  | 2.1729E-06  | 0.00026964  | 33.33 |
| STK33       | 314196  | 551 | 13  | 29 | 3  | 0  | 0  | 3.14677E-06 | 0.000365818 | 33.33 |
| GRIK1       | 71816   | 904 | -14 | 22 | 2  | 15 | 0  | 4.65238E-06 | 0.000510192 | 33.33 |
| MARK2       | 1321109 | 201 | 51  | 23 | 4  | 3  | 8  | 8.65572E-06 | 0.00087307  | 33.33 |
| SLC27A3     | 1687837 | 175 | 33  | 20 | 0  | 2  | 9  | 1.22125E-15 | 1.64537E-12 | 31.75 |
| <b>APC</b>  | 247811  | 399 | 28  | 24 | 0  | 6  | 4  | 5.55778E-13 | 4.19323E-10 | 31.75 |
| NIPSNAP3B   | 194451  | 718 | -21 | 30 | 0  | 3  | 5  | 1.65934E-12 | 1.1178E-09  | 31.75 |
| H3F3C       | 271605  | 394 | 20  | 24 | 0  | 2  | 5  | 2.92408E-10 | 1.12559E-07 | 31.75 |
| ZNF679      | NA      | NA  | NA  | 30 | 3  | 1  | 2  | 2.95492E-08 | 6.3336E-06  | 31.75 |

|          |         |     |     |    |    |    |    |             |             |       |
|----------|---------|-----|-----|----|----|----|----|-------------|-------------|-------|
| RYBP     | 102513  | 607 | 32  | 19 | 0  | 6  | 2  | 2.9976E-15  | 2.82704E-12 | 30.16 |
| WBP1     | 1069803 | 343 | 45  | 20 | 0  | 8  | 0  | 1.26232E-13 | 1.03522E-10 | 30.16 |
| NBPF11   | NA      | NA  | NA  | 20 | 0  | 0  | 0  | 1.37723E-12 | 9.62124E-10 | 30.16 |
| MTHFSD   | 70370   | 416 | 3   | 31 | 1  | 1  | 10 | 2.29494E-12 | 1.49266E-09 | 30.16 |
| DDX27    | 886628  | 261 | 50  | 21 | 1  | 5  | 0  | 2.68481E-10 | 1.07747E-07 | 30.16 |
| C10orf25 | 75634   | 905 | 25  | 19 | 0  | 0  | 19 | 4.71992E-10 | 1.71206E-07 | 30.16 |
| OR2J3    | 155147  | 738 | 1   | 26 | 1  | 0  | 11 | 2.89531E-09 | 7.80161E-07 | 30.16 |
| SLC22A14 | 301168  | 437 | 22  | 28 | 0  | 4  | 2  | 1.10797E-07 | 2.00947E-05 | 30.16 |
| RHBG     | 2199280 | 201 | 27  | 19 | 2  | 0  | 3  | 7.92805E-07 | 0.000111596 | 30.16 |
| NPBWR1   | 99395   | 697 | -19 | 23 | 0  | 0  | 11 | 1.79308E-11 | 9.14082E-09 | 28.57 |
| KRT4     | 1781225 | 288 | 27  | 18 | 0  | 0  | 1  | 1.04343E-09 | 3.33581E-07 | 28.57 |
| FSCN3    | 411207  | 619 | -7  | 22 | 0  | 1  | 4  | 1.67522E-08 | 3.7174E-06  | 28.57 |
| SASH1    | 77939   | 454 | -8  | 18 | 17 | 5  | 1  | 4.87647E-08 | 9.6821E-06  | 28.57 |
| FAM151A  | 723136  | 415 | 20  | 22 | 3  | 0  | 5  | 1.13561E-07 | 2.03999E-05 | 28.57 |
| RTKN2    | 111669  | 382 | 9   | 18 | 0  | 0  | 2  | 1.5055E-07  | 2.67894E-05 | 28.57 |
| NAPB     | 188695  | 688 | -19 | 18 | 0  | 0  | 1  | 6.16288E-07 | 9.08159E-05 | 28.57 |
| DENND4C  | 499163  | 277 | 13  | 24 | 0  | 9  | 0  | 9.76624E-07 | 0.000133486 | 28.57 |
| MYOF     | 458453  | 380 | 16  | 25 | 6  | 15 | 0  | 1.73121E-06 | 0.0002252   | 28.57 |
| KYNU     | 48515   | 369 | 20  | 21 | 0  | 4  | 2  | 2.09597E-06 | 0.000261816 | 28.57 |
| AMACR    | 270768  | 793 | 4   | 19 | 0  | 2  | 7  | 2.51654E-06 | 0.000302337 | 28.57 |
| RPGRIP1L | 248316  | 406 | -15 | 19 | 0  | 1  | 0  | 6.21771E-06 | 0.000658888 | 28.57 |
| RNASEH2C | 4131934 | 202 | 53  | 17 | 0  | 1  | 4  | 1E-18       | 1E-16       | 26.98 |
| NUDT15   | 324467  | 567 | 34  | 24 | 0  | 0  | 4  | 8.88178E-16 | 1.28868E-12 | 26.98 |
| UGT1A5   | NA      | NA  | NA  | 31 | 2  | 0  | 1  | 4.19309E-12 | 2.55129E-09 | 26.98 |
| GPSM2    | 817825  | 236 | 19  | 22 | 0  | 15 | 2  | 3.88433E-09 | 1.03192E-06 | 26.98 |
| PSG5     | 307971  | 178 | -25 | 17 | 1  | 21 | 2  | 7.18088E-09 | 1.73648E-06 | 26.98 |
| POTEM    | NA      | NA  | NA  | 17 | 1  | 1  | 2  | 1.32625E-08 | 3.01395E-06 | 26.98 |
| HAP1     | 1617880 | 323 | 9   | 24 | 0  | 2  | 3  | 4.66192E-08 | 9.45518E-06 | 26.98 |
| RP1      | 148553  | 735 | -8  | 21 | 1  | 0  | 1  | 6.70683E-08 | 1.26504E-05 | 26.98 |

|           |         |      |     |    |    |    |    |             |             |       |
|-----------|---------|------|-----|----|----|----|----|-------------|-------------|-------|
| RFPL1     | 723458  | 203  | 35  | 18 | 2  | 6  | 1  | 1.63475E-07 | 2.88175E-05 | 26.98 |
| TCF7L2    | 156660  | 435  | -9  | 21 | 2  | 1  | 2  | 9.22352E-07 | 0.000126988 | 26.98 |
| SKIV2L    | 2314693 | 203  | 34  | 25 | 0  | 0  | 0  | 1.83979E-06 | 0.000237686 | 26.98 |
| LIMS1     | 363356  | 408  | 30  | 17 | 8  | 18 | 1  | 2.01088E-06 | 0.000252861 | 26.98 |
| ARHGAP19  | 945635  | 397  | 26  | 17 | 0  | 2  | 1  | 3.16129E-06 | 0.000365818 | 26.98 |
| MUC7      | 264556  | 861  | 26  | 18 | 0  | 0  | 15 | 1E-18       | 1E-16       | 25.4  |
| TXNDC2    | 431025  | 168  | 34  | 18 | 0  | 0  | 7  | 7.088E-12   | 4.17793E-09 | 25.4  |
| CDR1      | 18661   | NA   | -31 | 16 | 0  | 1  | 7  | 8.35941E-10 | 2.71854E-07 | 25.4  |
| GOLGA6L1  | NA      | NA   | NA  | 22 | 0  | 0  | 6  | 6.85725E-09 | 1.67976E-06 | 25.4  |
| ARHGAP42  | NA      | NA   | NA  | 16 | 0  | 0  | 1  | 7.85147E-09 | 1.87461E-06 | 25.4  |
| CASP7     | 200770  | 587  | 0   | 17 | 2  | 0  | 4  | 1.76682E-08 | 3.87508E-06 | 25.4  |
| VILL      | 318742  | 457  | 24  | 16 | 2  | 12 | 0  | 3.23303E-08 | 6.85185E-06 | 25.4  |
| OR51A2    | 65798   | 1006 | -15 | 24 | 1  | 0  | 8  | 5.84516E-08 | 1.12502E-05 | 25.4  |
| PSMB3     | 1198833 | 207  | 37  | 17 | 0  | 3  | 3  | 6.06656E-08 | 1.15583E-05 | 25.4  |
| TM4SF20   | 248187  | 164  | 18  | 16 | 0  | 0  | 2  | 3.44199E-07 | 5.50193E-05 | 25.4  |
| CES1      | 317734  | 581  | -28 | 16 | 0  | 14 | 1  | 4.68615E-07 | 7.17365E-05 | 25.4  |
| MANSC1    | 698798  | 242  | 20  | 19 | 3  | 0  | 3  | 7.29564E-07 | 0.00010425  | 25.4  |
| MYEOV     | 558031  | 443  | 37  | 27 | 1  | 0  | 5  | 1.95397E-06 | 0.000249026 | 25.4  |
| FER       | 140251  | 741  | 20  | 16 | 21 | 31 | 0  | 2.7992E-06  | 0.000332067 | 25.4  |
| USP18     | 521791  | 289  | 11  | 16 | 0  | 0  | 2  | 5.80085E-06 | 0.00062168  | 25.4  |
| TMPRSS7   | 265735  | 336  | 21  | 20 | 15 | 1  | 3  | 7.38979E-06 | 0.000761673 | 25.4  |
| LPIN3     | 383021  | 309  | 5   | 18 | 0  | 0  | 3  | 8.78073E-06 | 0.000876307 | 25.4  |
| ARL2      | 3151458 | 209  | 52  | 15 | 0  | 0  | 15 | 1.11022E-16 | 1.90373E-13 | 23.81 |
| CST4      | 189028  | 819  | -21 | 15 | 2  | 0  | 2  | 1.81563E-10 | 7.78328E-08 | 23.81 |
| KRTAP5-2  | NA      | NA   | NA  | 17 | 0  | 1  | 2  | 2.04041E-10 | 8.55248E-08 | 23.81 |
| CPOX      | 364371  | 640  | 6   | 19 | 0  | 0  | 7  | 1.60769E-08 | 3.61003E-06 | 23.81 |
| PRKRIR    | 234429  | 366  | 57  | 19 | 0  | 0  | 7  | 5.77207E-08 | 1.1224E-05  | 23.81 |
| GPR110    | 203250  | 291  | -5  | 23 | 0  | 0  | 2  | 1.02534E-07 | 1.89607E-05 | 23.81 |
| KRTAP10-5 | 867542  | 461  | 28  | 19 | 0  | 0  | 12 | 1.65515E-07 | 2.89069E-05 | 23.81 |



|           |         |     |     |    |    |    |    |             |             |       |
|-----------|---------|-----|-----|----|----|----|----|-------------|-------------|-------|
| MMP20     | 530118  | 436 | 17  | 19 | 0  | 0  | 3  | 3.98279E-07 | 6.26029E-05 | 23.81 |
| PIIG      | 345417  | 404 | 38  | 15 | 0  | 13 | 4  | 1.31235E-06 | 0.000175556 | 23.81 |
| TPRX1     | 881316  | 336 | 39  | 16 | 2  | 0  | 1  | 1.97209E-06 | 0.000249648 | 23.81 |
| THUMPD1   | 179233  | 641 | 14  | 16 | 0  | 0  | 2  | 3.90481E-06 | 0.000438408 | 23.81 |
| AKR1C1    | 343868  | 608 | -13 | 14 | 1  | 6  | 7  | 1E-18       | 1E-16       | 22.22 |
| ESD       | 272205  | 820 | 63  | 16 | 0  | 1  | 8  | 4.12569E-11 | 2.01778E-08 | 22.22 |
| TCTEX1D1  | 335045  | 692 | -16 | 25 | 0  | 3  | 7  | 7.94238E-11 | 3.74523E-08 | 22.22 |
| PABPN1L   | 860087  | 252 | 37  | 14 | 0  | 2  | 19 | 2.87041E-10 | 1.12559E-07 | 22.22 |
| SLC38A4   | 518041  | 415 | -10 | 14 | 1  | 6  | 3  | 5.02501E-10 | 1.75522E-07 | 22.22 |
| C12orf45  | 514255  | 204 | 37  | 14 | 0  | 0  | 8  | 1.75847E-07 | 3.04297E-05 | 22.22 |
| FAHD2A    | 255441  | 536 | 19  | 16 | 1  | 1  | 21 | 2.11721E-07 | 3.50306E-05 | 22.22 |
| CYP20A1   | 417679  | 298 | 23  | 14 | 0  | 0  | 4  | 4.08947E-07 | 6.37484E-05 | 22.22 |
| DKKL1     | 2183690 | 309 | 30  | 19 | 0  | 0  | 2  | 5.93586E-07 | 8.81593E-05 | 22.22 |
| POU5F1B   | NA      | NA  | NA  | 25 | 0  | 1  | 2  | 6.50582E-07 | 9.43944E-05 | 22.22 |
| EHD3      | 102236  | 884 | 15  | 14 | 0  | 2  | 4  | 2.46457E-06 | 0.000299914 | 22.22 |
| OSCAR     | 767094  | 317 | -50 | 14 | 0  | 0  | 2  | 6.65367E-06 | 0.000693378 | 22.22 |
| KRTAP17-1 | 1149433 | 468 | -14 | 15 | 0  | 0  | 10 | 1E-18       | 1E-16       | 20.63 |
| SPANXD    | NA      | NA  | NA  | 24 | 0  | 0  | 6  | 1.44329E-15 | 1.70146E-12 | 20.63 |
| PGF       | 875817  | 222 | 53  | 13 | 0  | 0  | 3  | 8.60285E-11 | 3.95773E-08 | 20.63 |
| LCE4A     | 169158  | 818 | 24  | 15 | 0  | 0  | 1  | 3.63457E-10 | 1.37111E-07 | 20.63 |
| ASPHD1    | NA      | NA  | NA  | 13 | 3  | 0  | 2  | 3.85254E-10 | 1.42484E-07 | 20.63 |
| CCL11     | 40425   | 871 | -32 | 13 | 0  | 0  | 3  | 2.61633E-09 | 7.25722E-07 | 20.63 |
| CLIC3     | 1979517 | 188 | 34  | 14 | 0  | 0  | 5  | 2.89132E-09 | 7.80161E-07 | 20.63 |
| C6orf57   | 119480  | 618 | 15  | 13 | 0  | 0  | 1  | 6.23759E-09 | 1.58991E-06 | 20.63 |
| C10orf53  | NA      | NA  | NA  | 13 | 0  | 0  | 1  | 1.309E-08   | 3.01102E-06 | 20.63 |
| FAM91A1   | 483934  | 269 | 10  | 13 | 4  | 1  | 0  | 3.96308E-08 | 8.12518E-06 | 20.63 |
| N6AMT1    | 312901  | 480 | 6   | 13 | 0  | 2  | 3  | 3.09943E-06 | 0.000363114 | 20.63 |
| POLN      | 765279  | 332 | 34  | 13 | 9  | 16 | 3  | 3.74367E-06 | 0.00042538  | 20.63 |
| CA9       | 1202125 | 248 | 37  | 13 | 11 | 0  | 0  | 3.79894E-06 | 0.000429075 | 20.63 |

|             |         |      |     |    |   |    |    |             |             |       |
|-------------|---------|------|-----|----|---|----|----|-------------|-------------|-------|
| ZDHC12      | 1865107 | 197  | 38  | 13 | 0 | 0  | 1  | 8.75633E-06 | 0.000876307 | 20.63 |
| SLFNL1      | 341851  | 171  | 29  | 17 | 0 | 0  | 3  | 1.50324E-13 | 1.18142E-10 | 19.05 |
| C11orf40    | 190769  | 879  | -1  | 12 | 0 | 1  | 1  | 8.15108E-10 | 2.69729E-07 | 19.05 |
| IFT74       | 116568  | 447  | -12 | 17 | 0 | 0  | 3  | 2.14153E-09 | 6.17283E-07 | 19.05 |
| LIPF        | 145689  | 327  | 40  | 12 | 6 | 0  | 6  | 2.21524E-08 | 4.80273E-06 | 19.05 |
| RDM1        | 703538  | 424  | 31  | 13 | 0 | 6  | 1  | 3.79092E-08 | 7.85763E-06 | 19.05 |
| KRTAP13-2   | 4608    | 1035 | -69 | 12 | 1 | 0  | 4  | 6.50201E-07 | 9.43944E-05 | 19.05 |
| CDK5RAP2    | 386697  | 450  | 10  | 12 | 5 | 0  | 0  | 6.91063E-07 | 9.95025E-05 | 19.05 |
| KRT78       | 1781225 | 288  | 27  | 19 | 0 | 0  | 1  | 1.87866E-06 | 0.000241056 | 19.05 |
| KRTAP4-5    | 996799  | 468  | -7  | 19 | 1 | 0  | 5  | 6.5539E-06  | 0.000686776 | 19.05 |
| WDR63       | 443738  | 623  | 11  | 17 | 0 | 7  | 1  | 9.75822E-06 | 0.000968735 | 19.05 |
| CWF19L2     | 147499  | 853  | -10 | 28 | 0 | 11 | 3  | 9.06353E-12 | 5.07333E-09 | 17.46 |
| C21orf58    | 940047  | 624  | 53  | 17 | 0 | 0  | 3  | 2.12752E-10 | 8.72376E-08 | 17.46 |
| DMKN        | 954618  | 367  | 35  | 16 | 0 | 4  | 3  | 5.27123E-10 | 1.80775E-07 | 17.46 |
| PRKCI       | 361822  | 270  | 18  | 11 | 2 | 7  | 1  | 9.97406E-08 | 1.86268E-05 | 17.46 |
| OXA1L       | 1153069 | 351  | 36  | 11 | 9 | 0  | 1  | 2.43028E-07 | 3.98608E-05 | 17.46 |
| NENF        | 416515  | 283  | 18  | 11 | 0 | 0  | 7  | 4.77176E-07 | 7.2004E-05  | 17.46 |
| PBOV1       | 341233  | 545  | 21  | 12 | 0 | 0  | 35 | 2.4808E-06  | 0.000299954 | 17.46 |
| <b>KRAS</b> | 259193  | 512  | 16  | 11 | 0 | 0  | 1  | 0.003206918 | 0.1214636   | 15.87 |
| SEC14L3     | 657636  | 288  | 48  | 12 | 0 | 0  | 4  | 6.53967E-09 | 1.63883E-06 | 15.87 |
| PHC1        | 296906  | 416  | 12  | 10 | 1 | 1  | 5  | 6.60328E-09 | 1.63883E-06 | 15.87 |
| SLC6A11     | 225460  | 545  | 30  | 10 | 6 | 3  | 1  | 5.1222E-06  | 0.000555258 | 15.87 |
| CPNE1       | 1423559 | 169  | 53  | 18 | 0 | 1  | 1  | 7.11532E-06 | 0.000737413 | 15.87 |
| PPAP2C      | 233160  | 578  | -13 | 9  | 0 | 0  | 14 | 7.96141E-13 | 5.7757E-10  | 14.29 |
| H2BFM       | NA      | NA   | NA  | 9  | 0 | 0  | 50 | 1.11259E-11 | 5.9959E-09  | 14.29 |
| NACA2       | 323585  | 358  | -8  | 25 | 1 | 0  | 8  | 6.64195E-10 | 2.23715E-07 | 14.29 |
| FBXL8       | 1093307 | 150  | 47  | 9  | 0 | 1  | 5  | 5.38293E-09 | 1.41018E-06 | 14.29 |
| MYCT1       | 188249  | 600  | -9  | 9  | 0 | 0  | 2  | 3.36635E-08 | 7.05512E-06 | 14.29 |
| CD68        | 1957426 | 194  | 24  | 9  | 0 | 8  | 2  | 2.69544E-07 | 4.38288E-05 | 14.29 |

|           |         |     |     |    |   |    |    |             |             |       |
|-----------|---------|-----|-----|----|---|----|----|-------------|-------------|-------|
| PLA2G2C   | 608368  | 501 | 27  | 8  | 0 | 0  | 1  | 1.56224E-09 | 4.80018E-07 | 12.7  |
| CYP3A5    | 1395063 | 430 | 34  | 8  | 5 | 2  | 5  | 5.23316E-08 | 1.02821E-05 | 12.7  |
| CYB561    | 874574  | 267 | -20 | 8  | 0 | 1  | 4  | 1.0483E-07  | 1.91972E-05 | 12.7  |
| WDR70     | 302307  | 592 | 15  | 8  | 0 | 2  | 1  | 1.92174E-07 | 3.23641E-05 | 12.7  |
| DLX2      | 534370  | 295 | 34  | 9  | 0 | 1  | 3  | 2.98768E-06 | 0.00035221  | 12.7  |
| TMEM87B   | 564343  | 466 | 36  | 8  | 0 | 9  | 4  | 8.41021E-06 | 0.000852867 | 12.7  |
| C16orf52  | NA      | NA  | NA  | 7  | 0 | 0  | 50 | 1E-18       | 1E-16       | 11.11 |
| C19orf25  | 2352825 | 221 | 38  | 7  | 0 | 0  | 21 | 1.55088E-09 | 4.80018E-07 | 11.11 |
| SPG21     | 705779  | 185 | 57  | 7  | 0 | 0  | 4  | 9.45503E-09 | 2.22926E-06 | 11.11 |
| PRTFDC1   | 164255  | 142 | 18  | 7  | 0 | 2  | 3  | 7.55609E-07 | 0.00010716  | 11.11 |
| CD3G      | 963668  | 192 | 48  | 7  | 1 | 0  | 6  | 1.63174E-06 | 0.000213735 | 11.11 |
| CD300LG   | 1025836 | 241 | 19  | 7  | 0 | 0  | 1  | 2.19203E-06 | 0.000270236 | 11.11 |
| CLEC18C   | 1353954 | 139 | 37  | 7  | 1 | 1  | 3  | 2.3978E-06  | 0.000293683 | 11.11 |
| CCL26     | 1012112 | 255 | 51  | 7  | 0 | 1  | 3  | 3.72404E-07 | 5.90277E-05 | 9.52  |
| GCH1      | 673378  | 380 | 40  | 6  | 0 | 2  | 12 | 3.58932E-06 | 0.000410314 | 9.52  |
| C10orf88  | 282374  | 619 | 13  | 6  | 0 | 0  | 7  | 6.25284E-06 | 0.000658888 | 9.52  |
| C14orf178 | 429207  | 388 | 37  | 5  | 0 | 0  | 7  | 3.43714E-07 | 5.50193E-05 | 7.94  |
| NKX6-2    | 278505  | 581 | -12 | 5  | 0 | 0  | 18 | 4.61568E-06 | 0.000509128 | 7.94  |
| MGST2     | 382197  | 256 | 12  | 10 | 0 | 19 | 0  | 5.69371E-06 | 0.000613685 | 6.35  |

---

**Table S6.** Driver genes analyzed by OncodriveFM and MutSigCV

| Unnamed: 0      | PVALUE   | QVALUE   | SIFT_PVALUE | PPH2_PVALUE | MA_PVALUE | Hugo_Symbol |
|-----------------|----------|----------|-------------|-------------|-----------|-------------|
| ENSG0000013016  | 6.16E-07 | 6.74E-06 | 0.0015      | 0.0016      | 0.0012    | EHD3        |
| ENSG00000100285 | 0        | 0        | 1.00E-08    | 1.00E-08    | 1.00E-08  | NEFH        |
| ENSG00000101162 | 0        | 0        | 1.00E-08    | 1.00E-08    | 1.00E-08  | TUBB1       |
| ENSG00000103248 | 1.91E-07 | 2.18E-06 | 0.0008      | 0.0011      | 0.0009    | MTHFSD      |
| ENSG00000103494 | 0.000191 | 0.001316 | 0.0115      | 0.0137      | 0.012     | RPGRIP1L    |
| ENSG00000107159 | 0.00049  | 0.002848 | 0.0198      | 0.0158      | 0.0182    | CA9         |
| ENSG00000111961 | 0.00049  | 0.002848 | 0.0198      | 0.0158      | 0.0182    | SASH1       |
| ENSG00000116690 | 4.71E-05 | 0.000346 | 0.0079      | 0.0068      | 0.007     | PRG4        |
| ENSG00000117691 | 7.16E-14 | 1.19E-12 | 0.0001      | 1.00E-08    | 0.0001    | NENF        |
| ENSG00000119630 | 0        | 0        | 1.00E-08    | 1.00E-08    | 1.00E-08  | PGF         |
| ENSG00000128322 | 0.00018  | 0.001244 | 0.0104      | 0.0134      | 0.0127    | IGLL1       |
| ENSG00000132677 | 0        | 0        | 1.00E-08    | 1.00E-08    | 1.00E-08  | RHBG        |
| ENSG00000137674 | 7.79E-09 | 9.60E-08 | 0.0004      | 0.0003      | 0.0002    | MMP20       |
| ENSG00000141510 | 0        | 0        | 1.00E-08    | 1.00E-08    | 1.00E-08  | TP53        |
| ENSG00000151131 | 0        | 0        | 1.00E-08    | 1.00E-08    | 1.00E-08  | C12orf45    |
| ENSG00000160298 | 0.000276 | 0.001811 | 0.0131      | 0.0157      | 0.0141    | C21orf58    |
| ENSG00000160654 | 1.38E-13 | 2.23E-12 | 0.0001      | 1.00E-08    | 0.0002    | CD3G        |
| ENSG00000165511 | 0        | 0        | 1.00E-08    | 1.00E-08    | 1.00E-08  | C10orf25    |
| ENSG00000168418 | 5.12E-13 | 7.84E-12 | 1.00E-08    | 0.0002      | 0.0004    | KCNG4       |
| ENSG00000168955 | 0.000384 | 0.002466 | 0.0171      | 0.0167      | 0.015     | TM4SF20     |
| ENSG00000170423 | 0.001245 | 0.006892 | 0.0265      | 0.0266      | 0.0245    | KRT78       |
| ENSG00000170909 | 3.38E-07 | 3.80E-06 | 0.0015      | 0.0011      | 0.0009    | OSCAR       |
| ENSG00000171790 | 0.00047  | 0.002848 | 0.0157      | 0.0189      | 0.0183    | SLFNL1      |
| ENSG00000172927 | 0        | 0        | 1.00E-08    | 1.00E-08    | 1.00E-08  | MYEOV       |

---

|                 |          |          |          |          |          |           |
|-----------------|----------|----------|----------|----------|----------|-----------|
| ENSG00000173805 | 1.10E-06 | 1.14E-05 | 0.002    | 0.0013   | 0.0021   | HAP1      |
| ENSG00000181958 | 0        | 0        | 1.00E-08 | 1.00E-08 | 1.00E-08 | OR4A15    |
| ENSG00000182333 | 0        | 0        | 1.00E-08 | 0.0002   | 1.00E-08 | LIPF      |
| ENSG00000183729 | 0        | 0        | 1.00E-08 | 1.00E-08 | 1.00E-08 | NPBWR1    |
| ENSG00000186860 | 0.00049  | 0.002848 | 0.0198   | 0.0158   | 0.0182   | KRTAP17-1 |
| ENSG00000188375 | 0        | 0        | 1.00E-08 | 1.00E-08 | 1.00E-08 | H3F3C     |
| ENSG00000196539 | 0.001732 | 0.009178 | 0.0313   | 0.0289   | 0.0284   | OR2T3     |
| ENSG00000197079 | 6.05E-08 | 7.22E-07 | 0.0007   | 0.0008   | 0.0004   | KRT35     |
| ENSG00000198848 | 0        | 0        | 1.00E-08 | 0.0002   | 1.00E-08 | CES1      |
| ENSG00000204790 | 0        | 0        | 1.00E-08 | 1.00E-08 | 1.00E-08 | CBWD6     |
| ENSG00000205022 | 6.53E-07 | 6.95E-06 | 0.0016   | 0.0012   | 0.0016   | PABPN1L   |
| ENSG00000205496 | 0        | 0        | 0.0003   | 1.00E-08 | 1.00E-08 | OR51A2    |
| ENSG00000221852 | 0        | 0        | 1.00E-08 | 1.00E-08 | 1.00E-08 | KRTAP1-5  |
| ENSG00000242110 | 7.82E-10 | 1.17E-08 | 0.0002   | 0.0001   | 0.0001   | AMACR     |
| ENSG00000254440 | 0        | 0        | 1.00E-08 | 1.00E-08 | 1.00E-08 | PBOV1     |
| ENSG00000254521 | 2.33E-06 | 2.20E-05 | 0.0018   | 0.0027   | 0.0026   | SIGLEC12  |
| ENSG00000256294 | 0        | 0        | 1.00E-08 | 1.00E-08 | 1.00E-08 | ZNF225    |
| ENSG00000263956 | 0        | 0        | 1.00E-08 | 0.0002   | 1.00E-08 | NBPF11    |
| ENSG00000274391 | 9.64E-05 | 0.00068  | 0.0098   | 0.0091   | 0.0096   | TPTE      |
| ENSG00000277791 | 6.92E-07 | 7.35E-06 | 0.0021   | 0.0013   | 0.0012   | PSMB3     |

---
